# Supplementary material
Source: PubMed Central journal article supplement (PMC1400564)
Supplement: plntphys_pp.105.072652_2.pdf [file plntphys_pp.105.072652_2.pdf]

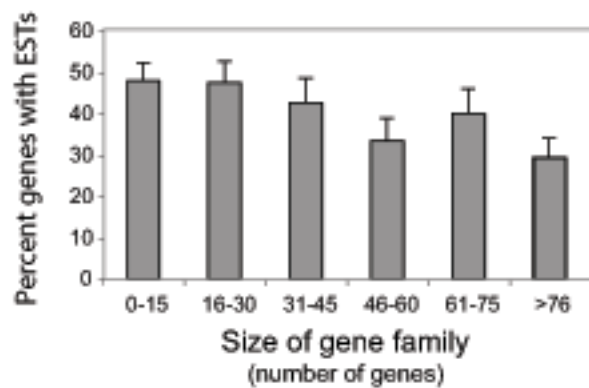

Supp. Figure 1. Large gene families have proportionally fewer strongly expressed genes. Each of the 76 CAZyme-encoding gene families in *Populus* was scored for the number of genes with observed ESTs in any of the 17 libraries (Table II) and expressed as a fraction of total gene family size. The histogram shows average number of genes with ESTs and a standard error. Families with 46 or more genes had a significantly smaller fraction of genes with ESTs. Note that some of the genes without ESTs might still be expressed at low levels or in tissues / conditions other than those sampled.
